# Supplementary material for: Cohesive Properties of the Caulobacter crescentus Holdfast Adhesin Are Regulated by a Novel c-di-GMP Effector Protein
Source: PubMed Central journal article supplement (PMC5362036; doi:10.1128/mbio.00294-17), 2017-03-21
Supplement: mbo002173241s1.pdf [file mbo002173241s1.pdf]

1 **Cohesive properties of the *Caulobacter crescentus* holdfast**  
2 **adhesin are regulated by a novel c-di-GMP effector protein**

3  
4 Kathrin S. Sprecher, Isabelle Hug, Jutta Nesper, Eva Potthoff, Mohamed-Ali  
5 Mahi, Matteo Sangermani, Volkhard Kaefer, Torsten Schwede, Julia Vorholt,  
6 Urs Jenal  
7

8 **Material and Methods**

9 **Bacterial strains and growth conditions**

10 All bacterial strains and plasmids used in this study are listed in Table S1  
11 (below). *E. coli* strains were grown at 37°C or 30°C under aeration in Luria Broth  
12 (LB) medium supplemented with the appropriate antibiotic (solid/liquid in  
13 µg/ml: kanamycin 50/30; chloramphenicol 30/20) and the inducer Isopropyl β-  
14 D-1-thiogalacto-pyranoside (IPTG 0.3 or 0.75 mM) if required. *C. crescentus*  
15 strains were grown at 30°C under aeration in peptone yeast extract (PYE) or M2  
16 minimal medium supplemented with 0.1% glucose (M2G). Media were  
17 supplemented with the appropriate antibiotic (solid/liquid in µg/ml: kanamycin  
18 20/5; nalidixic acid 20/n.a.) or inducer (IPTG 0.2 or 0.5 mM, xylose 0.1%, vanillic  
19 acid 0.1 mM or 0.55 mM) if required. Media were solidified by addition of 1.5%,  
20 0.75% or 0.3% agar for regular growth plates, top-agar and, motility plates,  
21 respectively. Optical density of cultures was measured at 600 nm (*E. coli*) or  
22 660 nm (*C. crescentus*) with a photo spectrometer (Ultrospec 2100 pro,  
23 Amersham Biosciences, USA). If required cell cultures were synchronized using  
24 density gradient centrifugation as previously described (1).

25

26

27

## 28 **Attachment assay**

29 For 24-hour attachment assay 5  $\mu$ l overnight culture were added to 155  $\mu$ l  
30 appropriate medium in a 96 well polystyrene microtiter plate and grown for  
31 24 h under aeration at 30°C. After absorbance was measured at 660 nm to  
32 confirm equal growth, the plates were rinsed thoroughly with water and,  
33 incubated for 30 min with 180  $\mu$ l 0.1% (m/V) crystal violet/ 1% Methanol/  
34 Isopropanol. The plates were rinsed again, dried, and the adherent crystal violet  
35 was dissolved in 200  $\mu$ l 20% acetic acid for 15 min shaking at 30°C before  
36 absorption at 600 nm was measured.

37 For a 30-min attachment assay, overnight cultures were diluted to an OD<sub>660</sub>  
38 of 0.06 in fresh medium, grown to an OD<sub>660</sub> of 0.3-0.5. Cell numbers were  
39 adjusted to an OD<sub>660</sub> of 0.3 before 160  $\mu$ l culture was incubated into 96 well  
40 polystyrene microtiter plates and grown for 30 min under aeration at 30°C.  
41 Crystal violet staining was done as described above.

42

## 43 **Fluorescence microscopy**

44 Cells were harvested in mid-log phase (OD<sub>660</sub> 0.3 - 0.5) and mounted on 1%  
45 agarose pads (Sigma, USA) in water for snap shots or in PYE containing  
46 appropriate supplements for time-lapse experiments. For 3D-SIM and time lapse  
47 microscopy samples were sealed with highly viscous silicone grease (Sigma  
48 Aldrich) to avoid agar shrinking.

49 Fluorescence, phase contrast (PH), and differential interference contrast  
50 (DIC) images were taken with a wide-field DeltaVision Core Olympus IX71  
51 microscope (Applied Precision, USA) with SoftWoRx software and  
52 environmental chamber, equipped either with UPlanSApo 100x/ 1.40 oil

53 objective (Olympus, Japan) and a coolSNAP HQ-2 CCD camera (Photometrics,  
54 USA) or UPlan FL 100x/ 1.3 and UPlanSApo 100x/1.40 oil objectives (Olympus,  
55 Japan) and a pco.Edge sCMOS camera (PCO, Germany). Images with mCherry  
56 fusion proteins were taken with a Nikon Ti-E inverted motorized microscope  
57 with Perfect Focus System and PlanApo 100x/1.4 Oil Ph3 DM objective lens,  
58 SPECTRA × light engine (Lumencore), camera pco.Edge 4.2 (PCO, Germany), and  
59 VisiView software (Visitron Systems, Germany). Images showing protein  
60 localization were deconvolved using SoftWoRx and Huygens software.

61 3D-SIM imaging was performed on a microscope system (DeltaVision OMX-  
62 Blaze version 4; Applied Precision, USA) equipped with 405, 445, 488, 514, 568,  
63 and 642 nm solid-state lasers. Images were acquired using a PlanApoN 60x/1.42  
64 oil objective lens (Olympus) and 4 liquid-cooled sCMOS cameras (pco.Edge, full  
65 frame 2560 x 2160; Photometrics). Exciting light was directed through a  
66 movable optical grating to generate a fine-striped interference pattern on the  
67 sample plane. The pattern was shifted laterally through five phases and three  
68 angular rotations of 60° for each z section. Optical z-sections were separated by  
69 0.125 μm. The laser line 488 nm was used for 3D-SIM acquisitions. Multichannel  
70 imaging was achieved through sequential acquisition of wavelengths by separate  
71 cameras.

72 Raw 3D-SIM images were processed and reconstructed using the DeltaVision  
73 OMX SoftWoRx software package (Applied Precision (2, 3)). The resulting size of  
74 the reconstructed images was of 512 x 512 px from an initial set of 256 x 256  
75 raw images. The channels were aligned in the image plane and around the  
76 optical axis using predetermined shifts as measured using a target lens and the  
77 SoftWoRx alignment tool. The channels were then carefully aligned using

78 alignment parameter from control measurements with 0.5  $\mu\text{m}$  diameter multi-  
79 spectral fluorescent beads (Invitrogen, Molecular Probes).

80

### 81 **Holdfast and membrane stain**

82 To visualize membrane, mid log phase cultures were mounted on 1% agarose in  
83 PYE pads supplemented with 0.66  $\mu\text{g}/\text{ml}$  FM4-64 dye (Molecular probes, USA).

84 To visualize holdfast, mid log phase cultures were mixed with a final  
85 concentration of 1  $\mu\text{g}/\text{ml}$  wheat germ agglutinin (WGA) coupled to Oregon green  
86 (Invitrogen, USA), incubated for 10 min, and visualized by fluorescence  
87 microscopy. For time-lapse microscopy experiments 2.66  $\mu\text{g}/\text{ml}$   
88 tetramethylrhodamine-WGA was added into the agarose pads.

89

### 90 **Adherence to glass**

91 To visualize adherent holdfast on glass a protocol was adapted from (4).  
92 500 $\mu\text{l}$ /well overnight culture were diluted to an  $\text{OD}_{660}$  of 0.15 and incubated  
93 with round 12 mm borosilicate coverslips (Thermo Scientific, USA) in 24 well  
94 polystyrene plates for 2 h at 30°C under aeration. If plasmid induction was  
95 required, overnight grown cultures were diluted first 1:10 in medium containing  
96 the inducing agent and grown to mid-log phase, before cell numbers were  
97 adjusted to an  $\text{OD}_{660}$  of 0.15 and added to the coverslips. After incubation, the  
98 coverslip side facing upwards was stained for 15 min with 2.5  $\mu\text{g}/\text{ml}$  WGA  
99 coupled to Oregon green, tetramethylrhodamine, or AlexaFluor®350, rinsed  
100 with water, and mounted on 1% agarose pads. Co-attachment experiments were  
101 performed on glass coverslips as described above, yet the co-cultured strains  
102 were mixed 1:1 to a final  $\text{OD}_{660}$  of 0.15 before incubation. For quantification 10

103 images were taken in random areas and the mean gray value was measured for  
104 each using the FIJI software (5). The mean gray value measured on glass slides  
105 prepared with the holdfast-minus NA1000 strains was subtracted to correct for  
106 background fluorescence.

107

### 108 **Quantification of protein localization**

109 Quantitative fluorescent signal measurements of individual cells were performed  
110 using a MATLAB based program developed in our group (WHISIT). WHISIT  
111 calculated average pixel fluorescent signal intensity for the membrane and  
112 cytoplasmic compartments. The membrane compartment was defined to enclose  
113 the first four intracellular pixel flanking the cell outline which was computed by  
114 Oufi (6) on phase contrast images, whilst the remaining intracellular pixels were  
115 defined as cytoplasmic compartment. The WHISIT program is available online at  
116 <http://ch.mathworks.com/matlabcentral/fileexchange/61676-whisit>.

117

### 118 **Microfluidics**

119 For the observation of bacteria under flow conditions they were grown in  
120 polydimethylsiloxane (PDMS) based microfluidics devices produced as  
121 previously described (7), consisting of a single channel of 10 mm length, 40  $\mu\text{m}$   
122 width, and 25  $\mu\text{m}$  height connecting an in- and outlet. Mid-log phase cells were  
123 carefully filled into the channel before a constant flow (0.002  $\mu\text{l/s}$ ) of PYE  
124 medium supplemented with 1  $\mu\text{g/ml}$  Oregon green-WGA was installed to allow  
125 growth. If necessary movies were corrected for bleaching using ImageJ Plugin  
126 CorrectBleach (V2.0.2, Kota Miura; Curtis Rueden; Mark Hiner; Johannes

127 Schindelin; Jens Rietdorf, Centre for Molecular and Cellular Imaging (CMCI),  
128 EMBL Heidelberg, [[http://wiki.cmci.info/downloads/bleach\\_corrector](http://wiki.cmci.info/downloads/bleach_corrector)]

### 129 **Immunoblots**

130 Cells were harvested and normalized in 1x SDS-SB (0.1 M Tris pH 6.8/ 5%  
131 Glycerol/ 0.2% sodium dodecyl sulfate (SDS)/ 1%  $\beta$ -Mercaptoethanol/ 0.025%  
132 Bromophenol blue) to the same OD<sub>660</sub>. Samples were boiled for 5 min at 95°C,  
133 separated on 12% SDS-acrylamide gel electrophoreses (PAGE), and transferred  
134 onto PVDF-membranes (Immobilon-P, Millipore, USA). Proteins were detected  
135 using specific primary polyclonal antibodies (anti-CtrA 1:10,00, anti-CC0164  
136 1:20,000, anti-ClpX 1:10,000, anti-GFP 1:800 (Invitrogen, USA)) and anti-rabbit  
137 secondary antibodies coupled to horseradish peroxidase (1:10,000, Dako,  
138 Denmark). After incubation with LumiGLO or LumiGLO reserve  
139 chemiluminescent substrate (KPL, USA) luminescence was detected using LAS-  
140 4000 luminescent image analyzer (Fujifilm, Japan). Immunoblot bands were  
141 quantified by measuring mean gray values with FIJI (5, 8).

142 StrepII-HfsK was purified as described below and injected into rabbits to  
143 raise polyclonal antibodies, (Josman LLC, USA). The serum was used in a  
144 1:20,000 dilution.

145

### 146 **Cell fractionation**

147 150 ml mid log phase cultures were harvested by centrifugation (8000 xg,  
148 20 min, 4°C) and washed in 50 ml PBS. The pellet was resuspended in 7 ml per  
149 gram wet weight CellFrac-Buffer (PBS/ 1x cComplete mini EDTA-free Protease  
150 Inhibitor (Roche)/ 2.5  $\mu$ g/ml DNaseI (Roche)), lysed using a French- pressure  
151 cell press at 1 bar (Thermo Electron corporation, USA), and spun to remove cell

152 debris (10 min, 18,000 xg, 4°C). To separate soluble from insoluble proteins, 1 ml  
153 of this cleared cell lysate was centrifuged at high speed (1 h, 100,000 xg, 4°C).  
154 The supernatant was removed and kept as soluble fraction whereas the pellet  
155 was washed in CellFrac-Buffer. The washed pellet was resuspended in 1 ml  
156 CellFrac-Buffer and kept as the pellet fraction. Cleared lysate, soluble and pellet  
157 fraction were diluted in 5x SDS-SB, boiled for 5 min at 95°C, and further analyzed  
158 using immunoblot.

159

### 160 **Protein purification**

161 pET28aStrepII plasmids expressing wild-type HfsK and mutant derivatives were  
162 transformed into *E. coli* Rosetta (DE3). Cells were grown at 30°C to an OD<sub>600</sub> of  
163 0.6, before the plasmid was induced with 0.75 mM IPTG for 4 h. Cells were  
164 harvested and resuspended in 50 mM NAH<sub>2</sub>PO<sub>4</sub> / 300 mM NaCl supplemented  
165 with 1 μM Pepstatin / 1 mM DTT / 1x cComplete mini (Roche) / 2.5 μg/ml DNaseI  
166 (Roche) and lysed using a French- pressure cell press at 1 bar. The StrepII-  
167 tagged proteins were purified from cleared lysates with Strep-Tactin Superflow  
168 plus resins (Qiagen) according to the manufacturer's protocol and used in the  
169 elution buffer or in 20 mM Tris pH 8.5/200 mM NaCl for further experiments.

170 The pET28aHis-HfsK plasmid was transformed into NiCo21(DE3) cells and  
171 grown at 37°C to an OD<sub>600</sub> of 0.6. Protein expression was induced with 0.3 mM  
172 IPTG and incubation was continued at 22°C overnight. Cells were resuspended in  
173 20 mM Tris pH 8.5/ 0.75 M NaCl/ 3 mM beta-mercaptoethanol/ 0.1%Tween-20  
174 / 20 mM/ 1mM PMSF/ 1 μm pepstatin supplemented with protease inhibitor  
175 tablet (Roche) and disrupted using a microfluidizer (M-110L pneumatic,  
176 Microfluidics). Cleared lysate was applied to a 5 ml HisTrap HP column (GE

177 Healthcare) and the His-tagged protein was eluted with a gradient of elution  
178 buffer containing 20 mM Tris pH 8.5/ 0.5 M NaCl/ 3 mM beta-mercaptoethanol/  
179 0.1%Tween-20/ 500 mM imidazole. The eluted fractions containing HfsK  
180 protein were concentrated and injected on a Superdex 200 10/300 GL increase  
181 gel filtration column (GE Healthcare) equilibrated with 30 mM HEPES pH 7.4/  
182 0.3 M NaCl/ 3 mM beta-mercaptoethanol/ 5 mM MgCl<sub>2</sub>. The peak fractions  
183 corresponding to HfsK were collected and the concentration adjusted for ITC  
184 experiment.

185

#### 186 **Isothermal titration calorimetry**

187 The interaction of HfsK with c-di-GMP was measured with a VP-ITC isothermal  
188 titration calorimeter from MicroCal with 13 μM HfsK in the cell and 211 μM  
189 c-di-GMP in the syringe (buffer: 30 mM HEPES pH 7.4, 0.3 M NaCl, 5 mM MgCl<sub>2</sub>,  
190 and 3 mM beta-mercaptoethanol). All solutions were thoroughly degassed and  
191 equilibrated to 22°C before filling into the calorimeter. The first injection of 3 μl  
192 was followed by 29 injections of 10 μl and the temperature of the calorimetric  
193 cell was maintained at 22°C. The delay between the injections was set to 6–7 min  
194 to ensure complete re-equilibration between subsequent injections. The  
195 observed data were analyzed using the MicroCal version of ORIGIN and fitted  
196 with the “One binding site model” of ORIGIN.

197

#### 198 **UV crosslinking with [<sup>33</sup>P]c-di-GMP**

199 [<sup>33</sup>P]c-di-GMP was synthesized using [<sup>33</sup>P]GTP (Hartmann Analytic, Germany)  
200 and the diguanylate cyclase DgcZ from *E. coli*. DgcZ purification and c-di-GMP



201 productions was performed as previously described (9, 10). Crosslinking  
202 experiments were performed as described in (11). In short, 1  $\mu$ M purified  
203 protein, an appropriate concentration of [<sup>33</sup>P] c-di-GMP, and reaction buffer  
204 (50 mM NaH<sub>2</sub>PO<sub>4</sub> pH 6.5/ 200 mM NaCl/ 1 mM DTT or 20 mM Tris  
205 pH 8.5/200 mM NaCl/ 1 mM DTT) were mixed and incubated for 10 min at RT.  
206 In competition experiments the protein was pre-incubated with unlabeled  
207 competitor before [<sup>33</sup>P]c-di-GMP was added. Samples were irradiated at 254 nm  
208 for 3 min at 4°C, mixed with 5x SDS-Sample Buffer, and boiled for 5 min. The  
209 samples were separated on 12% acrylamide gels using SDS-PAGE. The gels were  
210 dried and exposed to a phosphor screen that was scanned on a Typhoon FLA  
211 7000 imaging system (GE Healthcare). Autoradiogram bands were quantified  
212 using FIJI (5, 8) by measuring the mean gray value and binding curves were  
213 fitted with GraphPad Prism 6.0.

214

#### 215 **SCFS measurements with FluidFM**

216 In order to obtain clean substrates for the SCFS experiments, glass dishes (WillCo  
217 Wells B.V., The Netherlands) were sonicated in 2-propanol (Scharlau, Spain) and  
218 subsequently in ultra-pure water for 10 min at room temperature in a  
219 Branson 2210 Ultrasound bath and dried under nitrogen gas stream right before  
220 use. Cultures grown overnight in PYE were diluted to an OD<sub>600</sub> of 0.001 and  
221 together with a final concentration of 0.1  $\mu$ g/ml Oregon green-WGA were added  
222 to the clean glass dishes. SCFS measurements were started right away and could  
223 last several hours. Thus, measurements comprise this range of surface contact  
224 times for all strains.

225 Preparation and calibration of the cantilever was performed as described  
226 earlier (12). Briefly, rectangular, hollow silicon nitride cantilevers containing a  
227 hollow pyramid at the free-end (Cytosurge AG, Switzerland) were 36  $\mu\text{m}$  wide,  
228 150  $\mu\text{m}$  long, and had a channel height of 1  $\mu\text{m}$ , resulting in a stiffness of about  
229 2.5 N/m. Circular 300 – 700 nm diameter openings at the pyramidal apex were  
230 drilled by focused ion beam after sloping the pyramid's tip to compensate for the  
231  $10^\circ$  tilt angle of the AFM probe holder (13). Prior to the experiments the probes  
232 were plasma-cleaned for 30 s (Plasma Cleaner PDG-32G, Harrick Plasma, USA)  
233 and covered with an antifouling coating of 0.5 mg/ml poly-L-lysine (PLL)  
234 (20 kDa) that was grafted with poly-ethylene glycol (PEG) (2 kDa) (PLL-*g*-PEG)  
235 (Surface Solution SuSoS AG, Switzerland) in filtered ultra-pure water (14).  
236 FluidFM probes were coated from the in- and outside with PLL-*g*- PEG for 1 h  
237 and subsequently washed in filtered PBS for 5 min (15). Cantilever sensitivity  
238 was calibrated using software-implemented scripts based on the formalism  
239 described by Sader and colleagues (16).

240 A FluidFM connected via tubing to a pressure controller (Cytosurge AG,  
241 Zürich and Nanosurf AG, Liestal, Switzerland) was mounted on an Axio Observer  
242 D1 inverted microscope (Carl Zeiss, Jena, Germany).

243 For previously developed FluidFM applications, the probe was directly  
244 approached onto adherent cells prior to underpressure based cell  
245 immobilization to the cantilever and subsequent cell detachment of the substrate  
246 (12, 14). However, a direct approach onto the cell is not possible for  
247 *C. crescentus*, as the flexible parts of the cells are pushed away during the  
248 downward movement of the probe. In order to achieve a defined distance above  
249 the substrate, the pyramidal tip was approached next to a *Caulobacter* cell and

250 retracted until the desired separation was achieved. Subsequently, to immobilize  
251 the cell to the cantilever, the probe was moved in x-y directions above the target  
252 cell and 0.8 atm underpressure was applied for reversible cell immobilization at  
253 the pyramidal tip opening. Subsequently the probe, together with the attached  
254 cell was retracted at a piezo velocity of 1  $\mu\text{m/s}$ , while forces were recorded.  
255 Underpressure was maintained during this process until the bacterium was  
256 completely detached from the substrate. Subsequently the bacterium was  
257 released from the cantilever by an overpressure pulse of 1 atm. SCFS data were  
258 analyzed with SPIP software (Image Metrology A/S, Hørsholm, Denmark).

259

## 260 **Statistics**

261 For statistical comparison, paired t-tests were used if not stated otherwise.  
262 Calculations were performed with GraphPad Prism.

263

## 264 **C-di-GMP quantification**

265 C-di-GMP was extracted from 20 ml liquid culture of strains harboring a deletion  
266 in *hfsA* (holdfast-) and *cc00471* (capsule-) to prevent EPS based clogging of the  
267 HPLC column. Extraction and quantification was performed as previously  
268 described (17, 18).

269

## 270 **Alignments, phylogenetic analysis and structural model**

271 Sequence homologs of HfsK were obtained using Blast search (19) (database  
272 accessed July 2015) and the phylogenetic tree was computed with Geneious 7.1.7  
273 using global alignment with free end gaps and neighbor joining methodology.

274 The structural model of HfsK was created with the MPI bioinformatics  
275 Toolkit (20) using structural homology search with HHpred (21), followed by  
276 structure prediction with the build-in modeller function (22). Structure based  
277 alignment was adapted from the HHpred structural homology search output and  
278 multiple sequence alignments were created using MUSCLE (23).

279

### 280 **Phage and motility assay**

281 Phage lysates were prepared based on (24). In short, mid-log phase bacterial  
282 culture was mixed with phage lysate, incubated for 10 min at room temperature,  
283 mixed with prewarmed PYE top-agar (0.75%) and poured onto a PYE plate. After  
284 overnight growth at 30 °C, 5 ml CPB buffer (10 mM Tris pH 7.5 / 1 mM MgSO<sub>4</sub> /  
285 1 mM CaCl<sub>2</sub>) were added and incubated again overnight at 4 °C. The next day,  
286 lysed cells were scraped from the plate, mixed with 150 µl chloroform and  
287 incubated for 1 h. After centrifugation (5,000 xg, 10 min), another 150 µl  
288 chloroform were added to the cleared supernatant to get the phage lysate stock.

289 To assess phage susceptibility, 200 µl stationary phase culture was mixed with  
290 2.5 ml PYE top-agar (45°C) and poured on top of PYE plates. Onto the solidified  
291 agar 5 µl of serial dilutions of phage lysate were spotted. Phage lysates were  
292 made in CPB buffer. The plates were incubated for 1 day at 30°C and scanned  
293 (ScanMaker i800, Microtek International). To score motility, semi-solid PYE  
294 0.3% agar plates were inoculated with a single colony and incubated for 3 days  
295 in a humidified chamber at 30°C. The plates were scanned and colony size was  
296 measured using FIJI (5, 8).

297

### 298 **Construction of plasmids**

299 For pNPTS138-based deletion plasmids roughly 500 bp up-and downstream of  
300 the target gene were amplified from genomic CB15 DNA with PCR, cut with  
301 restriction enzymes as indicated in Table S1 (below), and ligated at the same  
302 time into EcoRI/ HindIII (or in case of pNPTS- $\Delta$ 2278: SpeI/ EcoRI) cut pNPTS138  
303 vector. In case of pNPTS138- $\Delta$ *hfsK* and the inner primers (3585/35876) have  
304 extensions that are complementary to each other, thus the two fragments were  
305 fused using SOE-PCR and primers 8584/3587. The fused products were cut with  
306 EcoRI/HindIII and ligated in the likewise cut pNPTS138 vector.

307

308 StrepII-fusions were generated using the subcloning vector pET28A-StrepII-MCS  
309 which was generated by annealing of two complementary oligonucleotides  
310 encoding the *strepII* tag (primer 3287/3288), followed by restriction enzyme  
311 digest with NcoI/ BamHI and ligation into the likewise cut pET28a vector.

312 pKaS105 was generated by amplification of *hfsK*<sub>R352A,R353A</sub> from pKaS95 with PCR  
313 followed by restriction enzyme digest using primers and enzymes as indicated in  
314 Table S1 below and ligation into the likewise cut pET28A-StrepII-MCS  
315 subcloning vector. pET28strepII-*hfsK* and pKaS93 were generated by  
316 amplification of *hfsK* and *hfsK*<sub>trnc</sub> from genomic CB15 DNA with PCR followed by  
317 restriction enzyme digest using primers and enzymes as indicated in Table S1  
318 below and ligation into the likewise cut pET28A-StrepII-MCS subcloning vector.

319 pKaS84 was generated similarly except that in addition SOE-PCR was used to  
320 introduce mutation R112A with the mutagenic primers 8890/8891.

321

322 pKaS2, pKaS1, pKaS9, pKaS22, pKaS67, pKaS95, pKaS106, pKaS111, pKaS12,  
323 pMT687-*hfsK*, pKaS113, and pKaS114 were generated by amplification of the

324 gene of interest from genomic CB15 DNA with PCR followed by restriction  
 325 enzyme digest using primers and enzymes as indicated in Table S1 below and  
 326 ligation into the likewise cut pMT552, pMT590, or pMT697 vector. pKaS77 was  
 327 generated by using primers 8828/8830 as well as template pMT552 to amplify  
 328 *egfp* and primers 8829/8831 as well as the template pNPTS138-*hfsK-tm* (see  
 329 below) to amplify *secE-tm* with a linker region. As Primer 8829 and 8830 have  
 330 extensions that are complementary to each other, the two fragments were fused  
 331 using SOE-PCR generating *egfp-tm* with primers 8828/8831. This was cut with  
 332 EcoRI and NheI and ligated into the cut pKaS22 vector. pNPTS138-*hfsK-tm* was  
 333 generated by amplifying with PCR from genomic DNA the last 500 bp of *hfsK*  
 334 with primer 4033/8396, *tm* region of *secE* with primer 8395/8398 and 500 bp  
 335 downstream region of *hfsK* with primer 8397/4036. As the primer pairs 8395/  
 336 8396 and 8397/8398 have extensions that are complementary to each other,  
 337 SOE-PCR was used to first fuse the *hfsK* fragment with *secE-tm* using primers  
 338 4033/8398 and then the resulting *hfsK-tm* fragment with the downstream  
 339 fragment of *hfsK* using primers 4033/4036. The resulting product was cut with  
 340 HindIII and EcoRI and ligated into the likewise cut pNPTS138 vector.

341

342 pKaS90 was generated by extracting *hfsK<sub>trnc</sub>* from pKaS67 by restriction enzyme  
 343 digest with NdeI/ KpnI followed by ligation into the linearized vector pKaS77.

344

345 **Table S1: Strains and plasmids used in this study**

346 **Plasmids**

| Plasmid  | Description                                                                                                                  | Source/<br>Reference |
|----------|------------------------------------------------------------------------------------------------------------------------------|----------------------|
| pET28a   | Kan <sup>R</sup> , pBR322 based high copy vector with promoter from T7 bacteriophage                                         | Novagen®             |
| pNPTS138 | Kan <sup>R</sup> , suicide vector with <i>sacB</i> and <i>oriT</i> , for generation of genomic mutations by allelic exchange | D. Alley             |

| Plasmid                        | Description                                                                                                                                                                                                                                | Source/<br>Reference |
|--------------------------------|--------------------------------------------------------------------------------------------------------------------------------------------------------------------------------------------------------------------------------------------|----------------------|
| pMT552                         | Kan <sup>R</sup> , pVGFPC-2, <i>vanA</i> -P <sub>van</sub> -MCS- <i>egfp</i> ; for generating C-terminal <i>egfp</i> fusions inserted in the <i>vanA</i> locus expressed from P <sub>van</sub> or for expression of <i>egfp</i> alone      | (25)                 |
| pMT585                         | Kan <sup>R</sup> , pXGFPC-2, <i>xylX</i> -P <sub>xyl</sub> -MCS- <i>egfp</i> ; for generating C-terminal <i>egfp</i> fusions inserted in the <i>xylX</i> locus expressed from P <sub>xyl</sub> or for expression of <i>egfp</i> alone      | (25)                 |
| pMT590                         | Kan <sup>R</sup> , pXCHYC-2, <i>xylX</i> -P <sub>xyl</sub> -MCS- <i>chy</i> ; for generating C-terminal <i>mcherry</i> fusions inserted in the <i>xylX</i> locus expressed from P <sub>xyl</sub> or for expression of <i>mcherry</i> alone | (25)                 |
| pMT697                         | Kan <sup>R</sup> , pXCHYN-2, <i>xylX</i> -P <sub>xyl</sub> - <i>chy</i> -MCS; for generating N-terminal <i>mcherry</i> fusions inserted in the <i>xylX</i> locus expressed from P <sub>xyl</sub> or for expression of <i>mcherry</i> alone | (25)                 |
| pMT687                         | Kan <sup>R</sup> , RK2 based low-copy vector with P <sub>xyl</sub>                                                                                                                                                                         | (25)                 |
| pSRK                           | Kan <sup>R</sup> , pBBR1MCS-2 based high copy vector with P <sub>lac</sub>                                                                                                                                                                 | (26)                 |
| pET28strepII- <i>hfsK</i>      | pET28a plasmid encoding <i>strepII-hfsK</i>                                                                                                                                                                                                | this study           |
| pKaS93                         | pET28a plasmid encoding <i>strepII-hfsK<sub>trnc</sub></i>                                                                                                                                                                                 | this study           |
| pKaS84                         | pET28a plasmid encoding <i>strepII-hfsK<sub>R112A</sub></i>                                                                                                                                                                                | this study           |
| pKaS105                        | pET28a plasmid encoding <i>strepII-hfsK<sub>R352A, R353A</sub></i>                                                                                                                                                                         | this study           |
| pET28his- <i>hfsK</i>          | pET28a plasmid encoding 6xhis- <i>hfsK</i>                                                                                                                                                                                                 | M. Meier             |
| pNPTS138- $\Delta$ <i>hfsK</i> | pNPTS138 derivative for generation of $\Delta$ <i>hfsK</i> mutation                                                                                                                                                                        | Y. Cohen             |
| pNPTS138- $\Delta$ 2278        | pNPTS138 derivative for generation of $\Delta$ <i>cc2278</i> mutation                                                                                                                                                                      | Y. Cohen             |
| pKaS110                        | pNPTS138 derivative for generation of $\Delta$ 1244 mutation                                                                                                                                                                               | this study           |
| pSA223                         | pNPTS138 derivative to integrate a P <sub>lac</sub> driven <i>dgcZ-3xflag</i> into the intergenic region of <i>cc3065</i> and <i>cc3066</i>                                                                                                | (27)                 |
| pSA81                          | pNPTS138 derivative for generation of $\Delta$ <i>pdeA</i> mutation                                                                                                                                                                        | (28)                 |
| pSA156                         | pNPTS138 derivative for generation of $\Delta$ <i>cc0091</i> mutation                                                                                                                                                                      | (27)                 |
| pNPTS138- $\Delta$ 00471       | pNPTS138 derivative for generation of $\Delta$ <i>ccna00471</i> mutation                                                                                                                                                                   | this study           |
| pSA79                          | pNPTS138 derivative for generation of $\Delta$ <i>cc1086</i> mutation                                                                                                                                                                      | (27)                 |
| pSA90                          | pNPTS138 derivative for generation of $\Delta$ <i>cc3148</i> mutation                                                                                                                                                                      | (27)                 |
| pNPTS138 $\Delta$ <i>hfaA</i>  | pNPTS138 derivative for generation of $\Delta$ <i>hfaA</i> mutation                                                                                                                                                                        | (29)                 |
| pNPTS138- $\Delta$ <i>hfaB</i> | pNPTS138 derivative for generation of $\Delta$ <i>hfaB</i> mutation                                                                                                                                                                        | this study           |
| pNPTS138 $\Delta$ <i>hfaD</i>  | pNPTS138 derivative for generation of $\Delta$ <i>hfaD</i> mutation                                                                                                                                                                        | (29)                 |
| pKaS59                         | pNPTS138 derivative for generation of $\Delta$ <i>hfsA</i> mutation                                                                                                                                                                        | this study           |
| pKaS25                         | pNPTS138 derivative for generation of $\Delta$ <i>hfsE</i> mutation                                                                                                                                                                        | this study           |
| pKaS26                         | pNPTS138 derivative for generation of $\Delta$ <i>hfsF</i> mutation                                                                                                                                                                        | this study           |
| pNPTS138 $\Delta$ <i>hfsG</i>  | pNPTS138 derivative for generation of $\Delta$ <i>hfsG</i> mutation                                                                                                                                                                        | (30)                 |
| pNPTS138 $\Delta$ <i>hfsH</i>  | pNPTS138 derivative for generation of $\Delta$ <i>hfsH</i> mutation                                                                                                                                                                        | (30)                 |
| pNPTS138 $\Delta$ <i>hfsI</i>  | pNPTS138 derivative for generation of $\Delta$ <i>hfsI</i> mutation                                                                                                                                                                        | (30)                 |
| pDM25                          | pNPTS138 derivative for generation of $\Delta$ <i>hfsJ</i> mutation                                                                                                                                                                        | D. Meyer             |
| pKaS52                         | pNPTS138 derivative for generation of $\Delta$ <i>hfsABCDEFGH</i> mutation                                                                                                                                                                 | this study           |
| pNPTS138 $\Delta$ <i>pssY</i>  | pNPTS138 derivative for generation of $\Delta$ <i>pssY</i> mutation                                                                                                                                                                        | (30)                 |
| pNPTS138 $\Delta$ <i>pssZ</i>  | pNPTS138 derivative for generation of $\Delta$ <i>pssZ</i> mutation                                                                                                                                                                        | (30)                 |
| pKaS22                         | pVGFPC-2 derivative for expression of <i>hfsK-egfp</i> from P <sub>van</sub>                                                                                                                                                               | this study           |
| pKaS67                         | pVGFPC-2 derivative for expression of <i>hfsK<sub>trnc</sub>-egfp</i> from P <sub>van</sub>                                                                                                                                                | this study           |
| pKaS77                         | pVGFPC-2 derivative for expression of <i>hfsK-egfp-tm</i> from P <sub>van</sub>                                                                                                                                                            | this study           |
| pKaS90                         | pVGFPC-2 derivative for expression of <i>hfsK<sub>trnc</sub>-egfp-tm</i> from P <sub>van</sub>                                                                                                                                             | this study           |
| pKaS95                         | pVGFPC-2 derivative for expression of <i>hfsK<sub>R352A, R353A</sub>-egfp</i> from                                                                                                                                                         | this study           |

| Plasmid     | Description                                                                                     | Source/Reference |
|-------------|-------------------------------------------------------------------------------------------------|------------------|
|             | $P_{van}$                                                                                       |                  |
| pKaS106     | pVGFPC-2 derivative for expression of <i>hfsK</i> <sub>R112A</sub> - <i>egfp</i> from $P_{van}$ | this study       |
| pKaS111     | pXCHYC-2 derivative for expression of <i>mcherry-hfsE</i> from $P_{xyl}$                        | this study       |
| pKaS112     | pXCHYC-2 derivative for expression of <i>mcherry-hfsF</i> from $P_{xyl}$                        | this study       |
| pKaS2       | pXCHYN-2 derivative for expression of <i>hfsG-mcherry</i> from $P_{xyl}$                        | this study       |
| pKaS1       | pXCHYN-2 derivative for expression of <i>hfsH-mcherry</i> from $P_{xyl}$                        | this study       |
| pKaS9       | pXCHYN-2 derivative for expression of <i>hfsK-mcherry</i> from $P_{xyl}$                        | this study       |
| pMT687-hfsK | pMT687 derivative for expression of <i>hfsK</i> from $P_{xyl}$                                  | this study       |
| pKaS113     | pMT687 derivative for expression of <i>cc2278</i> from $P_{xyl}$                                | this study       |
| pKaS114     | pMT687 derivative for expression of <i>cc1244</i> from $P_{xyl}$                                | this study       |
| pTB4        | pSRK derivative for expression of <i>dgcZ</i> from $P_{lac}$                                    | (27)             |

347

348

**Strains**

| Strain                      | Genotype                                                                                                                                                                                                                                        | Description                                                                                                                                        | Source/Reference    |
|-----------------------------|-------------------------------------------------------------------------------------------------------------------------------------------------------------------------------------------------------------------------------------------------|----------------------------------------------------------------------------------------------------------------------------------------------------|---------------------|
| <b><i>E. coli</i></b>       |                                                                                                                                                                                                                                                 |                                                                                                                                                    |                     |
| DH5alpha                    | $F^-$ <i>endA1 hsdR17</i> ( $r_K^- m_K^+$ ) <i>glnV44 thi-1 recA1 gyrA96 relA1</i> $\Delta(lacZYA-argF)U169 deoR$ $\Phi 80dlac\Delta M15$ )                                                                                                     | High efficiency transformation strain                                                                                                              | (31)                |
| DH10B                       | $F^-$ <i>mcrA</i> $\Delta(mrr-hsdRMS-mcrBC)$ $\Phi 80dlac\Delta M15 lacX74 endA1 recA1$ $\Delta(ara, leu)7697 araD139 galU galK nupG$ $\lambda$ -                                                                                               | Used in conjugations transferring plasmids to <i>C. crescentus</i> with help of MT607 as plasmid donor                                             | Invitrogen          |
| S17-1                       | RP4-2, Tc::Mu, KM-Tn7                                                                                                                                                                                                                           | Used in conjugations transferring plasmids to <i>C. crescentus</i> as plasmid donor                                                                | (32)                |
| MT607                       | pRK600 ( <i>cam</i> <sup>R</sup> )                                                                                                                                                                                                              | Conjugation helper strain with F-plasmid                                                                                                           |                     |
| Rosetta (DE3)               | $F^-$ <i>ompT hsdS<sub>B</sub></i> ( $r_B^- m_B^-$ ) <i>gal dcm</i> (DE3) pLysSRARE2 ( <i>Cam</i> <sup>R</sup> )                                                                                                                                | BL21 derivative; compatible with T7 expression vectors                                                                                             | Novagen®            |
| NiCo21 (DE3) pLys           | <i>can::CBD fhuA2 [lon] ompT gal</i> ( $\lambda$ DE3) [ <i>dcm</i> ] <i>arnA::CBD slyD::CBD glmS6Ala</i> $\Delta hsdS$ $\lambda$ DE3 = $\lambda$ <i>sBamHI</i> $\Delta EcoRI$ - <i>B</i> <i>int::(lac::PlacUV5::T7 gene1) i21</i> $\Delta nin5$ | BL21 derivative; compatible with T7 expression vector; minimizes <i>E. coli</i> protein contamination in immobilized metal affinity chromatography | New England Biolabs |
| <b><i>C. crescentus</i></b> |                                                                                                                                                                                                                                                 |                                                                                                                                                    |                     |
| NA1000                      | CB15N                                                                                                                                                                                                                                           | <i>C. crescentus</i> laboratory strain derived from CB15                                                                                           | (33)                |
| CB15                        | CB15                                                                                                                                                                                                                                            | <i>C. crescentus</i> wild-type ATCC19089                                                                                                           | (34)                |
| UJ5990                      | $\Delta hfsK$                                                                                                                                                                                                                                   | Markerless deletion of <i>hfsK</i> in CB15 using pNPTS138- $\Delta hfsK$                                                                           | this study          |
| UJ6136                      | $\Delta cc2278$                                                                                                                                                                                                                                 | Markerless deletion of <i>cc2278</i> in CB15 using pNPTS138- $\Delta 2278$                                                                         | Y. Cohen            |
| UJ6237                      | $\Delta cc1244$                                                                                                                                                                                                                                 | Markerless deletion of <i>cc1244</i> in CB15 using pKaS110                                                                                         | this study          |
| UJ6155                      | $\Delta hfsK \Delta cc2278$                                                                                                                                                                                                                     | Markerless deletion of <i>cc2278</i> in CB15 $\Delta hfsK$ using pNPTS138-                                                                         | this study          |



| Strain | Genotype                                                                                                                                            | Description                                                                                                                                                                    | Source/<br>Reference |
|--------|-----------------------------------------------------------------------------------------------------------------------------------------------------|--------------------------------------------------------------------------------------------------------------------------------------------------------------------------------|----------------------|
|        |                                                                                                                                                     | <i>Δ2278</i>                                                                                                                                                                   |                      |
| UJ6238 | <i>ΔhfsK Δcc1244</i>                                                                                                                                | Markerless deletion of <i>cc1244</i> in CB15 <i>ΔhfsK</i> using pKaS110                                                                                                        | this study           |
| UJ6239 | <i>Δcc2278 Δcc1244</i>                                                                                                                              | Markerless deletion of <i>cc1244</i> in CB15 <i>Δcc2278</i> using pKaS110                                                                                                      | this study           |
| UJ6241 | <i>ΔhfsK Δcc2278 Δ1244</i>                                                                                                                          | Markerless deletion of <i>cc1244</i> in CB15 <i>ΔhfsK Δ2278</i> using pKaS110                                                                                                  | this study           |
| UJ7113 | <i>ΔhfsK ΔhfsH</i>                                                                                                                                  | Markerless deletion of <i>hfsH</i> in CB15 <i>ΔhfsK</i> using pNPTS138 <i>ΔhfsH</i>                                                                                            | this study           |
| UJ9545 | <i>ΔhfaA</i>                                                                                                                                        | Markerless deletion of <i>hfaA</i> in CB15 using pNPTS138 <i>ΔhfaA</i>                                                                                                         | this study           |
| UJ6951 | <i>ΔhfaB</i>                                                                                                                                        | Markerless deletion of <i>hfaB</i> in CB15 using pNPTS138- <i>ΔhfaB</i>                                                                                                        | this study           |
| UJ9547 | <i>ΔhfaD</i>                                                                                                                                        | Markerless deletion of <i>hfaD</i> in CB15 using pNPTS138 <i>ΔhfaD</i>                                                                                                         | this study           |
| UJ9583 | <i>ΔhfaA ΔhfaD</i>                                                                                                                                  | Markerless deletion of <i>hfaA</i> in CB15 <i>ΔhfaD</i> using pNPTS138 <i>ΔhfaA</i>                                                                                            | this study           |
| UJ7112 | <i>ΔhfsH</i>                                                                                                                                        | Markerless deletion of <i>hfaH</i> in CB15 using pNPTS138 <i>ΔhfsH</i>                                                                                                         | this study           |
| UJ8820 | <i>ΔhfsE ΔpssY ΔpssZ</i>                                                                                                                            | Markerless deletion of <i>hfsE</i> , <i>pssY</i> and <i>pssZ</i> in CB15 using pKaS25, pNPTS138 <i>ΔpssY</i> and pNPTS138 <i>ΔpssZ</i>                                         | this study           |
| UJ8162 | <i>ΔhfsF</i>                                                                                                                                        | Markerless deletion of <i>hfsF</i> in CB15 using pKaS26                                                                                                                        | this study           |
| UJ7847 | <i>ΔhfsG</i>                                                                                                                                        | Markerless deletion of <i>hfsG</i> in CB15 using pNPTS138 <i>ΔhfsG</i>                                                                                                         | this study           |
| UJ9470 | <i>ΔhfsABCDEFGH ΔhfsI ΔhfsJ ΔhfsK</i>                                                                                                               | Markerless deletion of <i>hfsABCDEFGH</i> operons, <i>hfsI</i> , <i>hfsJ</i> , and <i>hfsK</i> in CB15 using pKaS52, pNPTS138 <i>ΔhfsI</i> , pDM25 and, pNPTS138- <i>ΔhfsK</i> | this study           |
| UJ5100 | <i>cdG<sup>0</sup>; Δcc0655 Δcc0740 Δcc0857 Δcc0896 ΔdgcB ΔpleD Δcc3094 ΔdgcA</i>                                                                   | Markerless deletion of <i>cc0655 cc0740 cc0857 cc0896 dgcB pleD cc3094 dgcA</i> in CB15                                                                                        | (27)                 |
| UJ8732 | <i>rcdG<sup>0</sup>; (Δcc0091 Δcc0655 Δcc0740 Δcc0857 Δcc0896 Δcc1086 ΔdgcB ΔpleD Δcc3094 Δcc3148 ΔdgcA ΔpdeA)</i>                                  | Markerless deletion of <i>cc0091</i> , <i>cc1086</i> , <i>cc3148</i> , <i>pdeA</i> in CB15 <i>cdG<sup>0</sup></i> using pSA156, pSA79, pSA81, and pSA90                        | this study           |
| UJ8781 | <i>rcdG<sup>0</sup>+dgcZ; (Δcc0091 Δcc0655 Δcc0740 Δcc0857 Δcc0896 Δcc1086 ΔdgcB ΔpleD Δcc3094 Δcc3148 ΔdgcA ΔpdeA P<sub>lac</sub>-ydeH-3xflag)</i> | Chromosomal integration of <i>P<sub>lac</sub></i> driven <i>dgcZ</i> into CB15 <i>rcdG<sup>0</sup></i> using pSA223                                                            | this study           |
| UJ8877 | <i>rcdG<sup>0</sup> ΔhfsK</i>                                                                                                                       | Markerless deletion of <i>hfsK</i> in CB15 <i>rcdG<sup>0</sup></i> using pNPTS138- <i>ΔhfsK</i>                                                                                | this study           |
| UJ8878 | <i>rcdG<sup>0</sup>+dgcZ ΔhfsK</i>                                                                                                                  | Markerless deletion of <i>hfsK</i> in CB15 <i>rcdG<sup>0</sup>+dgcZ</i> using pNPTS138- <i>ΔhfsK</i>                                                                           | this study           |
| UJ4463 | <i>ΔpleD</i>                                                                                                                                        | Markerless deletion of <i>pleD</i> in CB15                                                                                                                                     | (28)                 |
| UJ9078 | <i>ΔpleD ΔhfsK</i>                                                                                                                                  | Markerless deletion of <i>hfsK</i> in <i>ΔpleD</i> using pNPTS138- <i>ΔhfsK</i>                                                                                                | this study           |
| UJ9633 | <i>ΔhfsA Δccna00471</i>                                                                                                                             | Markerless deletion of <i>hfsA</i> and                                                                                                                                         | this study           |

| Strain        | Genotype                                                                              | Description                                                                                                                                                                                              | Source/<br>Reference |
|---------------|---------------------------------------------------------------------------------------|----------------------------------------------------------------------------------------------------------------------------------------------------------------------------------------------------------|----------------------|
| UJ9634        | <i>rcdG</i> <sup>0</sup> $\Delta$ <i>hfsA</i> $\Delta$ <i>ccna00471</i>               | <i>ccna00471</i> in CB15 using pKaS59 and pNPTS138- $\Delta$ 00471<br>Markerless deletion of <i>hfsA</i> and <i>ccna00471</i> in CB15 <i>rcdG</i> <sup>0</sup> using pKaS59 and pNPTS138- $\Delta$ 00471 | this study           |
| UJ9635        | <i>rcdG</i> <sup>0</sup> + <i>dgcZ</i> $\Delta$ <i>hfsA</i> $\Delta$ <i>ccna00471</i> | Markerless deletion of <i>hfsA</i> and <i>ccna00471</i> in CB15 <i>rcdG</i> <sup>0</sup> + <i>dgcZ</i> using pKaS59 and pNPTS138- $\Delta$ 00471                                                         | this study           |
| UJ7870        | $\Delta$ <i>hfsJ</i>                                                                  | Markerless deletion of <i>hfsJ</i> in CB15 using pDM25                                                                                                                                                   | this study           |
| UJ7871        | $\Delta$ <i>hfsJ</i> $\Delta$ <i>hfsK</i>                                             | Markerless deletion of <i>hfsJ</i> in CB15 $\Delta$ <i>hfsK</i> using pDM25                                                                                                                              | this study           |
| <b>Phages</b> |                                                                                       |                                                                                                                                                                                                          |                      |
| ΦCbK          |                                                                                       | Bacteriophage that uses pili of <i>C. crescentus</i> for infection                                                                                                                                       | (35)                 |
| ΦCR30         |                                                                                       | Bacteriophage that uses the paracrystalline surface- layer proteins of <i>C. crescentus</i> as a receptor                                                                                                | (36)                 |

349

350

**Primers**

| Primer | Sequence                                               | Restriction site | Used for plasmid                                          |
|--------|--------------------------------------------------------|------------------|-----------------------------------------------------------|
| 1380   | GAATTCTTCGACCGTCCCAGCCC                                | EcoRI            | pDM25                                                     |
| 1381   | GGATCCCGTGTCCAGACGCTCTA                                | BamHI            | pDM25                                                     |
| 1382   | GGATCCTGAGGAACGAACATCTCCGCAG                           | BamHI            | pDM25                                                     |
| 1383   | AAGCTTCGACAAGGACGGCCAGAAGGA                            | HindIII          | pDM25                                                     |
| 3287   | ATATACCATGGGATGGAGCCACCCGCAGTTCGAAAA<br>AGGATCCAAGCTT  | n/a              | pET28strepII- <i>hfsK</i> /<br>pKaS93/ pKaS84/<br>pKaS105 |
| 3288   | AAGCTTGGATCCTTTTTTCGAACTGCGGGTGGCTCCAT<br>CCCATGGTATAT | n/a              | pET28strepII- <i>hfsK</i> /<br>pKaS93/ pKaS84/<br>pKaS105 |
| 3300   | AAGGATCCCCATCGAAATCGTCAAAGC                            | BamHI            | pET28strepII- <i>hfsK</i> /<br>pKaS93/ pKaS84/<br>pKaS105 |
| 3301   | AAGCAAGCTTTCAGTGCAGTCCGCGCAGCA                         | HindIII          | pET28strepII- <i>hfsK</i> /<br>pKaS84/ pKaS105            |
| 3584   | AGAGAAGCTTGCAAGATCACCTCGCCGCGT                         | HindIII          | pNPTS- $\Delta$ <i>hfsK</i>                               |
| 3585   | TTGCCCATCGAAATCGTCAAACCTGCTGCGCGGACTGC<br>ACTGA        | n/a              | pNPTS- $\Delta$ <i>hfsK</i>                               |
| 3586   | TCAGTGCAGTCCGCGCAGCAGTTTGACGATTCGATG<br>GGCAA          | n/a              | pNPTS- $\Delta$ <i>hfsK</i>                               |
| 3587   | CTCTGAATTCGCTGTTTCGAGCGCATGGCC                         | EcoRI            | pNPTS- $\Delta$ <i>hfsK</i>                               |
| 3942   | AGACGACCATATGCCCATCGAAATCGTCAAAGC                      | NdeI             | pKaS22/ pKaS67/<br>pKaS95/ pKaS106/<br>pKaS9              |
| 3943   | GTGGTACCTCAGTGCAGTCCGCGCAGCA                           | KpnI             | pMT687- <i>hfsK</i>                                       |
| 3984   | ATATACTAGTATCGTGGTGATAGAGGCTCAC                        | SpeI             | pNPTS- $\Delta$ 2278                                      |

---

|      |                                              |         |                           |
|------|----------------------------------------------|---------|---------------------------|
| 3985 | ATATAAGCTTCTGCAATCGACAGGCCATTCC              | HindIII | pNPTS-Δ2278               |
| 3986 | ATATAAGCTTGCCTGATGGCGCGCTCACGG               | HindIII | pNPTS-Δ2278               |
| 3987 | ATATGAATTCGGCGACGAGACCGAAGACTG               | EcoRI   | pNPTS-Δ2278               |
| 4033 | GACAAAGCTTTGCTGACCCACCAGACCGAC               | HindIII | pKaS77                    |
| 4036 | TAGAATCTTCGAGCGCATGGCCGAGGC                  | EcoRI   | pKaS77                    |
| 4088 | GTCCAAGCTTCGACCCCCTGATCGACTG                 | HindIII | pKaS110                   |
| 4089 | ATGGTACCCGCATTAGGCCTTAAGCATC                 | KpnI    | pKaS110                   |
| 4090 | GAGGTACCCGTCTGGCGATGATGGTG                   | KpnI    | pKaS110                   |
| 4091 | TGAATTCCTGAGCGATTTCCAGCTT                    | EcoRI   | pKaS110                   |
| 4164 | CTTAAGGTCATATGCAGCCGGCGATCCATCTTT            | NdeI    | pKaS113                   |
| 4165 | ACTGGTACCATCAGGCCTCCGTGTGCTCT                | KpnI    | pKaS113                   |
| 4587 | AGACGACCATATGCAGGCCGACCGTATCAAGGT            | NdeI    | pKaS114                   |
| 4596 | TCAGGTACCTGAGGAGAGGCTACCGAGG                 | KpnI    | pKaS114                   |
| 4726 | TAGAATTCGCTGGAAAAGAAGACCAAG                  | EcoRI   | pNPTS-Δ00471              |
| 4727 | ATGGTACCGATCACGTCATTCGGCATTG                 | KpnI    | pNPTS-Δ00471              |
| 4728 | CAGGTACCCACTTCTCTCGGCCAATA                   | KpnI    | pNPTS-Δ00471              |
| 4729 | CATTGAAGCTTGACTGCGAACGATCGCTAGA              | HindIII | pNPTS-Δ00471              |
| 5181 | GGAATTCGACTTCTATCTAGGGGCTCG                  | EcoRI   | pNPTS138-ΔhfaB            |
| 5182 | GAGGTACCTGTGCGCTTGACCATCATTT                 | KpnI    | pNPTS138-ΔhfaB            |
| 5183 | GAGGTACCGATATCCGTGATGCTAAGCG                 | KpnI    | pNPTS138-ΔhfaB            |
| 5184 | GCTAGAAGCTTTCACGTTGATGTTGTTGCC               | HindIII | pNPTS138-ΔhfaB            |
| 5592 | GTGGTACCAGCAGTACTTCCGCGACCT                  | KpnI    | pKaS52                    |
| 5593 | GGAATTCAGAGTCCTGTTCCGGTCAGC                  | EcoRI   | pKaS52                    |
| 5684 | GAGATTACCATATGAACGCGCCCGTCAACGA              | NdeI    | pKaS2                     |
| 5685 | CCGGTACCAGCGCCTCGCTGTAGAGCG                  | KpnI    | pKaS2                     |
| 5686 | GAGATTATCATATGCCGATGGAATTCGAGAA              | NdeI    | pKaS1                     |
| 5687 | CCGGTACCAGCCCGATCCGCCGCG                     | KpnI    | pKaS1                     |
| 5692 | TAGGTACCGTTTTCCCAACGACGAGCAT                 | KpnI    | pKaS111                   |
| 5693 | TAGAATCTAGCGCACGGCGGACCGAT                   | EcoRI   | pKaS111                   |
| 5694 | TAGGTACCTTCTGGCGCGGCGTCCCTCGG                | KpnI    | pKaS112                   |
| 5695 | TAGAATCTCATGCGGCTTGCGCCTTTC                  | EcoRI   | pKaS112                   |
| 6119 | AGCAGGTACCGTGAGTCCGCGCAGCAGGT                | KpnI    | pKaS22/ pKaS106/<br>pKaS9 |
| 6874 | TTAACGGTACCCGCCGGATCCAGCACGCGCG              | KpnI    | pKaS26                    |
| 6875 | TTAACAAAGCTTCTTCAACAACGAGGCGATT              | HindIII | pKaS26                    |
| 6876 | CGTTATAGAATTCAAAAGCCCTCGTCGAAGC              | EcoRI   | pKaS26                    |
| 6877 | TTAGTGGTACCCGTCGAAAGGCGCAAGCCGC              | KpnI    | pKaS26                    |
| 6878 | TTAACGGTACCGCTGGCCCCGATCCCCATCA              | KpnI    | pKaS25/ pKaS52            |
| 6879 | TTAACAAAGCTTCGAACCCTCGATACCCTTT              | HindIII | pKaS25/ pKaS52            |
| 6880 | TTAAAGGAATTCGCCGGTCATGAACTTCAACT             | EcoRI   | pKaS25                    |
| 6881 | TTAAAGGTACCGGGGATCGGTCCGCCGTGCG              | KpnI    | pKaS25                    |
| 8373 | TGAGGTACCGGTGAGCGCTTTGGTGCCT                 | KpnI    | pKaS59                    |
| 8374 | ATTGAAGCTTGACGGTCTGGTCCATGTGC                | HindIII | pKaS59                    |
| 8375 | TGTAAGAATTCCTTACCCGAAATCTGCAC                | EcoRI   | pKaS59                    |
| 8376 | ATCGGTACCGGCACGCTGATCCAGGCGCT                | KpnI    | pKaS59                    |
| 8395 | ACGGSTCTAGAGGAAGATCTTGGATCACCTCGGTGAT<br>GGT | n/a     | pKaS77                    |

---

|      |                                                       |         |        |
|------|-------------------------------------------------------|---------|--------|
| 8396 | CAAGATCTTCTCTAGACCCGTGCAGTCCGCGCAGCA<br>GGT           | n/a     | pKaS77 |
| 8397 | TCAAGCTGGCGACCGCGGGATAGCGTCTAGAGCATT<br>TTCC          | n/a     | pKaS77 |
| 8398 | GGAAAATGCTCTAGACGCTATCCCGCGGTCCAGCT<br>TGA            | n/a     | pKaS77 |
| 8425 | GTGGTACCCTCGGCCACACTGCGGACCC                          | KpnI    | pKaS67 |
| 8828 | GAATTCGAACGTTACGCGTC                                  | EcoRI   | pKaS77 |
| 8829 | GCATGGACGAGCTGTACAAGGGGTCTAGAGGAAGA<br>TCT            | n/a     | pKaS77 |
| 8830 | AGATCTTCTCTAGACCCCTGTACAGCTCGTCCATGC                  | n/a     | pKaS77 |
| 8831 | AGTGGCTAGCCTATCCCGCGGTCCG                             | NheI    | pKaS77 |
| 8890 | TGGGTGCGATCGACTTTTGCCACATGATG                         | n/a     | pKaS84 |
| 8891 | CAAAAGTCGATCGCACCCACGCCGAGCACGT                       | n/a     | pKaS84 |
| 9216 | AGTGAAGCTTCACTCGGCCACACTGCGGACCC                      | HindIII | pKaS93 |
| 9432 | GTAGGTACCGTGCAGTCCGCGCAGCAGGTCGATGGC<br>GGCCATCGCCTTG | KpnI    | pKaS95 |

351

## 352 References

- 353 1. **Jenal U, Shapiro L.** 1996. Cell cycle-controlled proteolysis of a flagellar  
354 motor protein that is asymmetrically distributed in the *Caulobacter*  
355 predivisive cell. *EMBO J* **15**:2393–406.
- 356 2. **Gustafsson MG.** 2000. Surpassing the lateral resolution limit by a factor of  
357 two using structured illumination microscopy. *J Microsc* **198**:82–7.
- 358 3. **Schermelleh L, Carlton PM, Haase S, Shao L, Winoto L, Kner P, Burke B,**  
359 **Cardoso MC, Agard DA, Gustafsson MGL, Leonhardt H, Sedat JW.** 2008.  
360 Subdiffraction multicolor imaging of the nuclear periphery with 3D  
361 structured illumination microscopy. *Science* **320**:1332–6.
- 362 4. **Cole JL, Hardy GG, Bodenmiller D, Toh E, Hinz A, Brun YV.** 2003. The  
363 HfaB and HfaD adhesion proteins of *Caulobacter crescentus* are localized in  
364 the stalk. *Mol Microbiol* **49**:1671–83.
- 365 5. **Schindelin J, Arganda-Carreras I, Frise E, Kaynig V, Longair M,**  
366 **Pietzsch T, Preibisch S, Rueden C, Saalfeld S, Schmid B, Tinevez J-Y,**  
367 **White DJ, Hartenstein V, Eliceiri K, Tomancak P, Cardona A.** 2012. Fiji:  
368 an open-source platform for biological-image analysis. *Nat Methods*  
369 **9**:676–682.
- 370 6. **Paintdakhi A, Parry B, Campos M, Irnov I, Elf J, Surovtsev I, Jacobs-**  
371 **Wagner C.** 2015. Oufiti: An integrated software package for high-accuracy,  
372 high-throughput quantitative microscopy analysis. *Mol Microbiol* **1**–11.
- 373 7. **Deshpande S, Pfohl T.** 2012. Hierarchical self-assembly of actin in micro-  
374 confinements using microfluidics. *Biomicrofluidics* **6**:34120.
- 375 8. **Schneider CA, Rasband WS, Eliceiri KW.** 2012. NIH Image to ImageJ: 25  
376 years of image analysis. *Nat Methods* **9**:671–5.
- 377 9. **Boehm A, Steiner S, Zaehring F, Casanova A, Hamburger F, Ritz D,**  
378 **Keck W, Ackermann M, Schirmer T, Jenal U.** 2009. Second messenger  
379 signalling governs *Escherichia coli* biofilm induction upon ribosomal  
380 stress. *Mol Microbiol* **72**:1500–1516.
- 381 10. **Zähringer F, Massa C, Schirmer T.** 2011. Efficient enzymatic production

- 382 of the bacterial second messenger c-di-GMP by the diguanylate cyclase  
383 YdeH from *E. coli*. Appl Biochem Biotechnol **163**:71–9.
- 384 11. **Christen M, Christen B, Folcher M, Schauerte A, Jenal U.** 2005.  
385 Identification and characterization of a cyclic di-GMP-specific  
386 phosphodiesterase and its allosteric control by GTP. J Biol Chem  
387 **280**:30829–37.
- 388 12. **Potthoff E, Ossola D, Zambelli T, Vorholt JA.** 2015. Bacterial adhesion  
389 force quantification by fluidic force microscopy. Nanoscale **7**:4070–4079.
- 390 13. **Grüter RR, Vörös J, Zambelli T.** 2013. FluidFM as a lithography tool in  
391 liquid: spatially controlled deposition of fluorescent nanoparticles.  
392 Nanoscale **5**:1097–1104.
- 393 14. **Potthoff E, Guillaume-Gentil O, Ossola D, Polesel-Maris J, LeibundGut-**  
394 **Landmann S, Zambelli T, Vorholt JA.** 2012. Rapid and serial  
395 quantification of adhesion forces of yeast and Mammalian cells. PLoS One  
396 **7**:e52712.
- 397 15. **Huang N-P, Michel R, Voros J, Textor M, Hofer R, Rossi A, Elbert DL,**  
398 **Hubbell JA, Spencer ND.** 2001. Poly(l-lysine)-g-poly(ethylene glycol)  
399 Layers on Metal Oxide Surfaces: Surface-Analytical Characterization and  
400 Resistance to Serum and Fibrinogen Adsorption. Langmuir **17**:489–498.
- 401 16. **Sader JE, Chon JWM, Mulvaney P.** 1999. Calibration of rectangular atomic  
402 force microscope cantilevers. Rev Sci Instrum **70**:3967–3969.
- 403 17. **Boehm A, Kaiser M, Li H, Spangler C, Kasper CA, Ackermann M, Kaever**  
404 **V, Sourjik V, Roth V, Jenal U.** 2010. Second messenger-mediated  
405 adjustment of bacterial swimming velocity. Cell **141**:107–16.
- 406 18. **Spangler C, Böhm A, Jenal U, Seifert R, Kaever V.** 2010. A liquid  
407 chromatography-coupled tandem mass spectrometry method for  
408 quantitation of cyclic di-guanosine monophosphate. J Microbiol Methods  
409 **81**:226–231.
- 410 19. **Johnson M, Zaretskaya I, Raytselis Y, Merezhuk Y, McGinnis S, Madden**  
411 **TL.** 2008. NCBI BLAST: a better web interface. Nucleic Acids Res **36**:W5–9.
- 412 20. **Alva V, Nam S-Z, Söding J, Lupas AN.** 2016. The MPI bioinformatics  
413 Toolkit as an integrative platform for advanced protein sequence and  
414 structure analysis. Nucleic Acids Res **44**:W410–W415.
- 415 21. **Söding J, Biegert A, Lupas AN.** 2005. The HHpred interactive server for  
416 protein homology detection and structure prediction. Nucleic Acids Res  
417 **33**:W244–8.
- 418 22. **Hildebrand A, Remmert M, Biegert A, Söding J.** 2009. Fast and accurate  
419 automatic structure prediction with HHpred. Proteins Struct Funct  
420 Bioinforma **77**:128–132.
- 421 23. **Edgar RC.** 2004. MUSCLE: multiple sequence alignment with high accuracy  
422 and high throughput. Nucleic Acids Res **32**:1792–7.
- 423 24. **Ely B.** 1991. Genetics of *Caulobacter crescentus*, p. 372–384. In Methods in  
424 Enzymology.
- 425 25. **Thanbichler M, Iniesta AA, Shapiro L.** 2007. A comprehensive set of  
426 plasmids for vanillate- and xylose-inducible gene expression in  
427 *Caulobacter crescentus*. Nucleic Acids Res **35**:e137.
- 428 26. **Khan SR, Gaines J, Roop RM, Farrand SK.** 2008. Broad-Host-Range  
429 Expression Vectors with Tightly Regulated Promoters and Their Use To  
430 Examine the Influence of TraR and TraM Expression on Ti Plasmid

- 431 Quorum Sensing. *Appl Environ Microbiol* **74**:5053–5062.
- 432 27. **Abel S, Bucher T, Nicollier M, Hug I, Kaefer V, Abel Zur Wiesch P, Jenal**
- 433 **U.** 2013. Bi-modal distribution of the second messenger c-di-GMP controls
- 434 cell fate and asymmetry during the *Caulobacter* cell cycle. *PLoS Genet*
- 435 **9**:e1003744.
- 436 28. **Abel S, Chien P, Wassmann P, Schirmer T, Kaefer V, Laub MT, Baker**
- 437 **TA, Jenal U.** 2011. Regulatory cohesion of cell cycle and cell differentiation
- 438 through interlinked phosphorylation and second messenger networks.
- 439 *Mol Cell* **43**:550–60.
- 440 29. **Hardy GG, Allen RC, Toh E, Long M, Brown PJB, Cole-Tobian JL, Brun**
- 441 **YV.** 2010. A localized multimeric anchor attaches the *Caulobacter* holdfast
- 442 to the cell pole. *Mol Microbiol* **76**:409–27.
- 443 30. **Toh E, Kurtz HD, Brun YV.** 2008. Characterization of the *Caulobacter*
- 444 *crenscentus* holdfast polysaccharide biosynthesis pathway reveals
- 445 significant redundancy in the initiating glycosyltransferase and
- 446 polymerase steps. *J Bacteriol* **190**:7219–31.
- 447 31. **Hanahan D.** 1983. Studies on transformation of *Escherichia coli* with
- 448 plasmids. *J Mol Biol* **166**:557–80.
- 449 32. **Simon R, Priefer U, Pühler A.** 1983. A broad host range
- 450 mobilizationsystem for in vivo genetic engineering: transposon
- 451 mutagenesis in gram negative bacteria. *Bio/Technology* **1**:784–791.
- 452 33. **Evinger M, Agabian N.** 1977. Envelope-associated nucleoid from
- 453 *Caulobacter crescentus* stalked and swarmer cells. *J Bacteriol* **132**:294–
- 454 301.
- 455 34. **Stove Poindexter JL, Cohen-Bazire G.** 1964. The fine structure of stalked
- 456 bacteria belonging to the family Caulobacteraceae. *J Cell Biol* **23**:587–607.
- 457 35. **Schmidt JM, Stanier RY.** 1965. Isolation and Characterization of
- 458 Bacteriophages Active against Stalked Bacteria. *J Gen Microbiol* **39**:95–
- 459 107.
- 460 36. **Ely B, Johnson RC.** 1977. Generalized transduction in *Caulobacter*
- 461 *crenscentus*. *Genetics* **87**:391–399.
- 462
